# Supplementary material
Source: PubMed Central journal article supplement (PMC3165001)
Supplement: NIHMS205251-supplement-Supp_Data.pdf [file NIHMS205251-supplement-Supp_Data.pdf]

**Web-based Supplementary Materials for “Asymptotic conditional singular  
value decomposition for high-dimensional genomic data”**

**Jeffrey T. Leek**

**Johns Hopkins Bloomberg School of Public Health**

**Baltimore, MD 21205-2179**

**jleek@jhsph.edu**

**Web Appendix A**

*Proof of Theorem 1*

$\mathbf{W}^m$  can be broken into five terms:

$$\begin{aligned} \mathbf{W}^m &= \frac{1}{m} \mathbf{X}^{mT} \mathbf{X}^m - \hat{\sigma}_{ave}^2 \mathbf{I} \\ &= \underbrace{\frac{1}{m} \mathbf{G}^T \mathbf{\Gamma}^{mT} \mathbf{\Gamma}^m \mathbf{G}}_i + \underbrace{\frac{1}{m} \mathbf{G}^T \mathbf{\Gamma}^{mT} \mathbf{U}^m}_{ii} + \underbrace{\frac{1}{m} \mathbf{U}^{mT} \mathbf{\Gamma}^m \mathbf{G}}_{iii} + \underbrace{\frac{1}{m} \mathbf{U}^{mT} \mathbf{U}^m}_{iv} - \underbrace{\hat{\sigma}_{ave}^2 \mathbf{I}}_v \quad (\text{A.1}) \end{aligned}$$

We consider each of these terms individually.

*i*: This term converges to  $\mathbf{G}^T \mathbf{\Delta} \mathbf{G}$  by assumption 3.

*ii*: Let  $\mathbf{M} = \frac{1}{m} \mathbf{G}^T \mathbf{\Gamma}^{mT} \mathbf{U}^m = \frac{1}{m} \mathbf{B}^m \mathbf{U}^m$ , then  $m_{ij} = \frac{1}{m} \sum_{\ell=1}^m b_{i\ell} u_{\ell j}$  where  $E(b_{i\ell} u_{\ell j}) = 0$  and  $\text{var}(b_{i\ell} u_{\ell j}) = b_{i\ell}^2 \sigma_\ell^2$ . So by the Kolmogorov Strong Law of Large Numbers (KSLLN) (Feller, 1968)  $m_{ij} \rightarrow_{a.s.} 0$  for all  $i, j$ .

*iii*: By symmetry, this term also converges almost surely to zero.

*iv*: Let  $\mathbf{S} = \frac{1}{m} \mathbf{U}^{mT} \mathbf{U}^m$ , and consider the off-diagonal element  $s_{ij} = \frac{1}{m} \sum_{\ell=1}^m u_{\ell i} u_{\ell j}$ , where  $E(u_{\ell i} u_{\ell j}) = 0$  and  $\text{var}(u_{\ell i} u_{\ell j}) = E(u_{\ell i}^2 u_{\ell j}^2) - E(u_{\ell i} u_{\ell j})^2 = (\sigma_\ell^2)^2$ . So again by KSLLN  $s_{ij} \rightarrow_{a.s.} 0$ . Now consider the diagonal elements  $s_{ii} = \frac{1}{m} \sum_{\ell=1}^m u_{\ell i}^2$ , where  $E(u_{\ell i}^2) = \sigma_\ell^2$  and  $\text{var}(u_{\ell i}^2) = E(u_{\ell i}^4) - E(u_{\ell i}^2)^2$ . By assumptions 1 the variances are bounded, so by KSLLN  $s_{ii} \rightarrow_{a.s.} \bar{\sigma}^2 = \lim_{m \rightarrow \infty} \frac{1}{m} \sum_{i=1}^m \sigma_i^2$ , which exists because  $\sigma_i^2$  is bounded for all  $i$ .

Combining terms (i-iv) and applying Slutsky's theorem yields:  $\frac{1}{m} \mathbf{X}^{mT} \mathbf{X}^m \rightarrow_{a.s.} \mathbf{G}^T \mathbf{\Delta} \mathbf{G} +$

$\bar{\sigma}^2 \mathbf{I}$ . Since the eigenvalues of a matrix are defined as roots of a determinant depending on the elements of that matrix, and since the roots of a polynomial equation are a continuous multi-valued function of the coefficients (Henriksen and Isbell, 1953), the eigenvalue function is continuous. The eigenvalues of  $\frac{1}{m} \mathbf{X}^{mT} \mathbf{X}^m$  converge almost surely to the eigenvalues of  $\mathbf{G}^T \Delta \mathbf{G} + \bar{\sigma}^2 \mathbf{I}$  from the continuous mapping theorem. The eigenvalues of  $\mathbf{G}^T \Delta \mathbf{G} + \bar{\sigma}^2 \mathbf{I}$  are equal to  $\lambda_1 + \bar{\sigma}^2, \dots, \lambda_n + \bar{\sigma}^2$ ; but  $\lambda_{r+1}, \dots, \lambda_n$  are equal to zero by assumption, so the last  $n - r$  eigenvalues consistently estimate  $\bar{\sigma}^2$ .

$v : \hat{\sigma}_{ave}^2 = \frac{1}{m} \sum_{i=1}^m \frac{1}{(n-\kappa)} \sum_{j=1}^n (x_{ij} - \sum_{k=1}^{\kappa} \hat{\gamma}_{ik} \hat{u}_{kj})^2 = \frac{1}{n-\kappa} \sum_{k=\kappa}^n \lambda_k(\mathbf{Z}^m)$ , where  $\lambda_k(\mathbf{Z}^m)$  is the  $k$ th eigenvalue of  $\mathbf{Z}_m = \frac{1}{m} \mathbf{X}^{mT} \mathbf{X}^m$ . But for all  $\kappa > r$ ,  $\lambda_k(\mathbf{Z}^m)$  converges to  $\bar{\sigma}^2$  almost surely.

Combining terms (i-v) and applying Slutsky's theorem yields:  $\mathbf{W}^m \rightarrow_{a.s.} \mathbf{G}^T \Delta \mathbf{G}$ . By the same argument as above, the eigenvalues of  $\mathbf{W}^m$  converge almost surely to the eigenvalues of  $\mathbf{G}^T \Delta \mathbf{G}$  from the continuous mapping theorem. Further, since both the matrix  $\mathbf{W}^m$  and the eigenvalues converge almost surely, and the eigenvectors can be obtained from a linear operation of these two elements, the eigenvectors of  $\mathbf{W}^m$  corresponding to the unique eigenvalues must converge to the corresponding eigenvectors of  $\mathbf{G}^T \Delta \mathbf{G}$ .

#### *Proof of Lemma 1*

We wish to show that the indicator:

$$1 \{ \lambda_k(\mathbf{W}^m) \geq c_m \} = 1 \left\{ \frac{1}{c_m} \lambda_k(\mathbf{W}^m) \geq 1 \right\}.$$

consistently distinguishes between zero and non-zero eigenvalues. If  $\lambda_k(\mathbf{W}^m) = \lambda_k + O_P(m^{-\frac{1}{2}})$  then for any  $c_m = O(m^{-\eta})$ ,  $0 < \eta < \frac{1}{2}$ , when  $\lambda_k = 0$ ,  $\left(\frac{1}{c_m} \lambda_k(\mathbf{W}^m)\right) = O(m^\eta) O_P(m^{-\frac{1}{2}}) = m^{\eta-\frac{1}{2}} O_P(1)$  and  $1 \left\{ \frac{1}{c_m} \lambda_k(\mathbf{W}^m) \geq 1 \right\} \rightarrow_P 0$ . When  $\lambda_k > 0$ ,  $\left(\frac{1}{c_m} \lambda_k(\mathbf{W}^m)\right) = O(m^\eta) \left\{ \lambda_k + O_P(m^{-\frac{1}{2}}) \right\} = O(m^\eta) + o_P \left\{ m^{\eta-\frac{1}{2}} \right\} \rightarrow \infty$ . So when  $\lambda_k > 0$  and  $0 < \eta < \frac{1}{2}$ ,  $1 \left\{ \frac{1}{c_m} \lambda_k(\mathbf{W}^m) \geq 1 \right\} \rightarrow_P 1$ . To complete the proof, we must show that  $\lambda_k(\mathbf{W}^m) = \lambda_k + O_P(m^{-\frac{1}{2}})$ .

From the decomposition (A.1) we can write  $\mathbf{W}^m$  as a continuous function of:

$$\mathbf{y}_i = \frac{1}{m} \left( k_{i1} \mathbf{u}_i^T, \dots, k_{in} \mathbf{u}_i^T, u_{i1} \mathbf{u}_i^T, \dots, u_{in} \mathbf{u}_i^T \right)^T,$$

and  $\frac{1}{m} \mathbf{G}^T \mathbf{\Gamma}^{mT} \mathbf{\Gamma}^m \mathbf{G}$ , where  $\mathbf{K} = \mathbf{G}^T \mathbf{\Gamma}^{mT}$ , this is straightforward for components  $(i - iv)$ , for component  $v$ :

$$\hat{\sigma}_{ave}^2 = \frac{1}{n - \kappa} \sum_{k=\kappa}^n \lambda_k(\mathbf{Z}^m)$$

but  $\mathbf{Z}^m = \frac{1}{m} \mathbf{X}^{mT} \mathbf{X}^m$  is a continuous function of  $\mathbf{y}_i$  and  $\frac{1}{m} \mathbf{G}^T \mathbf{\Gamma}^{mT} \mathbf{\Gamma}^m \mathbf{G}$  and the eigenvalues of  $\mathbf{Z}^m$  are a continuous function of the matrix (Henriksen and Isbell, 1953), so  $\hat{\sigma}_{ave}^2$  is a continuous function of  $\mathbf{y}_i$ .

The expectation of  $\mathbf{y}_i$  is  $E(\mathbf{y}_i) = (0, \dots, 0, \sigma_i^2, 0, \dots, 0, \sigma_i^2, 0, \dots, 0, \sigma_i^2)^T$ . Define  $\mathbf{y}_i^* = \sqrt{m} \{\mathbf{y}_i - E(\mathbf{y}_i)\}$ ; the covariance matrix for this random variable is  $\text{cov}(\mathbf{y}_i^*) = \frac{1}{m} \mathbf{\Sigma}_i$ . From assumption 1,  $\frac{1}{m} \sum_{i=1}^m \mathbf{\Sigma}_i \rightarrow \mathbf{\Sigma}$  and  $\sum_{i=1}^m \mathbf{y}_i^*$  is asymptotically normally distributed if the Lindeberg condition holds for every  $\epsilon > 0$ . Let

$$\psi_i = \left\{ \sum_{j=1}^n (u_{ij}^2 - \sigma_i^2)^2 + \sum_{j=1}^n \sum_{k=1}^n k_{ij}^2 u_{ik}^2 + \sum_{k \neq j} u_{ij}^2 u_{ik}^2 \right\} \mathbf{1}(\|\mathbf{y}_i^*\|^2 > \epsilon).$$

The Lindeberg condition requires  $E(\psi_i) \rightarrow 0$  for every  $i$ . But  $\psi_i$  is only non-zero when:

$$\|\mathbf{y}_i^*\|^2 = \frac{1}{m} \left\{ \sum_{j=1}^n (u_{ij}^2 - \sigma_i^2)^2 + \sum_{j=1}^n \sum_{k=1}^n k_{ij}^2 u_{ik}^2 + \sum_{k \neq j} u_{ij}^2 u_{ik}^2 \right\} > \epsilon$$

an event that has probability zero as  $m \rightarrow \infty$ , so  $\psi_i \rightarrow_P 0$ . It is also clear that  $|\psi_i| \leq m \|\mathbf{y}_i^*\|^2$  and  $E\{m \|\mathbf{y}_i^*\|^2\} < \infty$  by assumption 1. So by the dominated convergence theorem  $E(\psi_i) \rightarrow_P 0$  for each  $i$  and hence for every  $\epsilon > 0$ ,

$$\sum_{i=1}^m E\{\|\mathbf{y}_i^*\| \mathbf{1}(\|\mathbf{y}_i^*\| > \epsilon)\} = \frac{1}{m} \sum_{i=1}^m E\{\psi_i\} \rightarrow_P 0$$

Since the Lindeberg condition is satisfied  $\sum_{i=1}^m \mathbf{y}_i^*$  is asymptotically normally distributed. Since  $\text{vec}(\mathbf{W}^m) = \mathbf{g}(\sum_{i=1}^m \mathbf{y}_i) + \text{vec}\left(\frac{1}{m} \mathbf{G} \mathbf{\Gamma}^{mT} \mathbf{\Gamma}^m \mathbf{G}\right)$ , where the function  $\text{vec}(\cdot)$  concatenates

the columns of a matrix and  $\mathbf{g}$  is a continuous function,

$$\sqrt{m} \left( \text{vec}(\mathbf{W}^m) - \text{vec} \left( \frac{1}{m} \mathbf{G}^T \mathbf{\Gamma}^{mT} \mathbf{\Gamma}^m \mathbf{G} \right) \right) \rightarrow \text{MVN}(\mathbf{0}, \mathbf{\Sigma}_w)$$

by the multivariate delta method, so  $\sqrt{m}(\mathbf{W}^m - \text{vec}(\frac{1}{m} \mathbf{G}^T \mathbf{\Gamma}^{mT} \mathbf{\Gamma}^m \mathbf{G})) = O_P(1)$ . Since  $\lambda_r - \lambda_{r+1} = c > 0$  and  $\mathbf{W}^m$  is symmetric and real, by Theorem 4.2 of Eaton and Tyler (1991),

$$\begin{aligned} \sqrt{m} \left\{ \lambda_1(\mathbf{W}^m), \dots, \lambda_n(\mathbf{W}^m) \right\}^T - (\lambda_1, \dots, \lambda_n)^T &= O_P(1) \\ \Rightarrow \sqrt{m} \lambda_k(\mathbf{W}^m) &= \sqrt{m} \lambda_k + O_P(1) \quad \forall k. \end{aligned}$$

So  $\lambda_k(\mathbf{W}^m) = \lambda_k + O_P(m^{-1/2})$ , which completes the proof.

*Proof of Corollary 1*

$$\begin{aligned} \mathbf{R}^m &= \mathbf{X}^m (\mathbf{I} - \mathbf{S}(\mathbf{S}^T \mathbf{S})^{-1} \mathbf{S}^T) \\ &= \{ \mathbf{B}^m \mathbf{S} + \mathbf{\Gamma}^m \mathbf{G} + \mathbf{U}^m \} \{ \mathbf{I} - \mathbf{S}^T (\mathbf{S} \mathbf{S}^T)^{-1} \mathbf{S} \} \\ &= \mathbf{\Gamma}^m \mathbf{G} + \mathbf{U}^m \mathbf{P}_s \end{aligned}$$

Then we can write:

$$\begin{aligned} \mathbf{W}_R^m &= \frac{1}{m} \mathbf{R}^{mT} \mathbf{R}^m - \hat{\sigma}_{ave}^2 \mathbf{I} \\ &= \underbrace{\frac{1}{m} \mathbf{G}^T \mathbf{\Gamma}^{mT} \mathbf{\Gamma}^m \mathbf{G}}_i + \underbrace{\frac{1}{m} \mathbf{G}^T \mathbf{\Gamma}^{mT} \mathbf{U} \mathbf{P}_s}_ii + \underbrace{\frac{1}{m} \mathbf{P}_s^T \mathbf{U}^{mT} \mathbf{\Gamma}^m \mathbf{G}}_iii + \underbrace{\frac{1}{m} \mathbf{P}_s^T \mathbf{U}^{mT} \mathbf{U}^m \mathbf{P}_s}_iv - \underbrace{\mathbf{P}_s^T \hat{\sigma}_{ave}^2 \mathbf{P}_s}_v \end{aligned}$$

Following the proof of Theorem 1, terms (ii) and (iii) converge to zero, term (i) converges to  $\mathbf{G}^T \mathbf{\Delta} \mathbf{G}$ , and term (iv) converges to  $\mathbf{P}_s^T \bar{\sigma}^2 \mathbf{P}_s = \bar{\sigma}^2 \mathbf{P}_s$ . Term (v) is equal to  $\hat{\sigma}_{ave}^2 \mathbf{P}_s$ , but  $\hat{\sigma}_{ave}^2$  is equal to  $\frac{1}{n-d-k} \sum_{k=(d+\kappa)}^n \lambda_k(\mathbf{Z}^m)$ , which converges almost surely to  $\bar{\sigma}^2$ . Thus,  $\mathbf{W}_R^m$

converges almost surely to  $\mathbf{G}^T \Delta \mathbf{G}$  and the result follows according to the proof of Theorem 1.

*Proof of Corollary 2*

The proof follows the proof of Lemma 1, where the function,  $\mathbf{g}$ , incorporates the project term  $\mathbf{P}_s$ .

**Web Appendix B**

[Figure 1 about here.]

[Figure 2 about here.]

[Figure 3 about here.]

[Figure 4 about here.]

[Figure 5 about here.]

[Figure 6 about here.]

[Figure 7 about here.]

[Figure 8 about here.]

**Web Appendix C**

[Table 1 about here.]

**References**

Eaton, M. L. and Tyler, D. E. (1991). On wielandt's inequality and its application to the asymptotic distribution of the eigenvalues of a random symmetric matrix. *Ann Stat* **19**, 260–271.

Feller, W. (1968). *An Introduction to Probability Theory and Its Applications*, volume 1. Wiley, 3 edition.

Henriksen, M. and Isbell, J. R. (1953). On the continuity of the real roots of an algebraic equation. *Proc Amer Math Soc* **4**, 431–4.

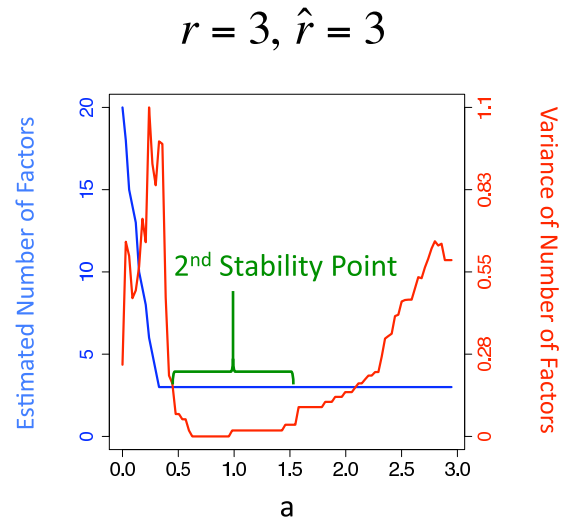

**Figure 1.** A plot of the estimated number of factors (blue and left axis) and the empirical variance of the estimate for varying set sizes (red and right axis) across a range of coefficients  $a$  for a simulated example with  $r = 3$ . The second stability point (green bracket) is the second point, moving from left to right, where the variance finds a trough. Hallin & Liska (2007) suggest using the estimate corresponding to this second stability point as a practical estimator of the number of factors.

$$r = 3, \hat{r} = 3$$

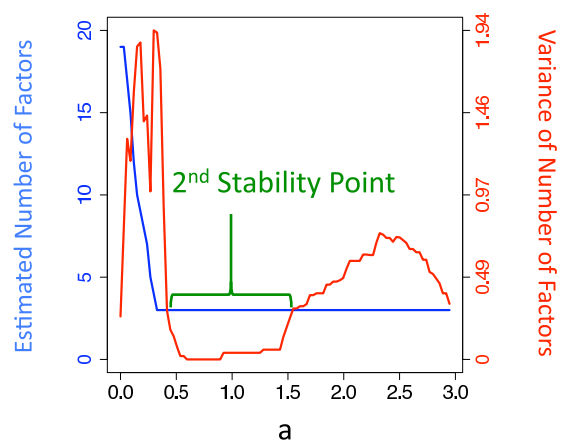

**Figure 2.** A plot of the estimated number of factors (blue and left axis) and the empirical variance of the estimate for varying set sizes (red and right axis) across a range of coefficients  $a$  for a simulated example with  $r = 3$ . The second stability point (green bracket) is the second point, moving from left to right, where the variance finds a trough. Hallin & Liska (2007) suggest using the estimate corresponding to this second stability point as a practical estimator of the number of factors.



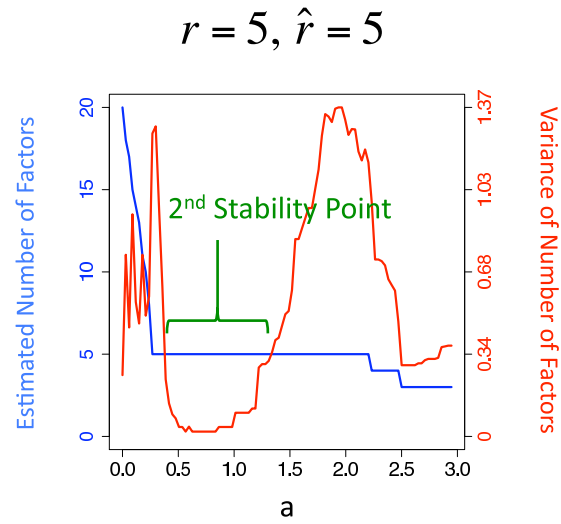

**Figure 3.** A plot of the estimated number of factors (blue and left axis) and the empirical variance of the estimate for varying set sizes (red and right axis) across a range of coefficients  $a$  for a simulated example with  $r = 5$ . The second stability point (green bracket) is the second point, moving from left to right, where the variance finds a trough. Hallin & Liska (2007) suggest using the estimate corresponding to this second stability point as a practical estimator of the number of factors.

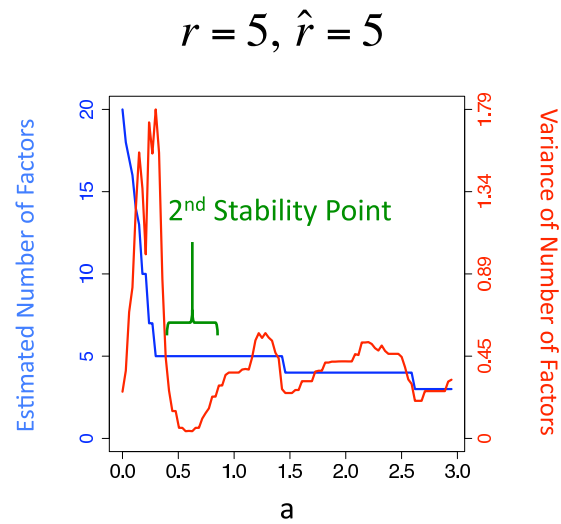

**Figure 4.** A plot of the estimated number of factors (blue and left axis) and the empirical variance of the estimate for varying set sizes (red and right axis) across a range of coefficients  $a$  for a simulated example with  $r = 5$ . The second stability point (green bracket) is the second point, moving from left to right, where the variance finds a trough. Hallin & Liska (2007) suggest using the estimate corresponding to this second stability point as a practical estimator of the number of factors.

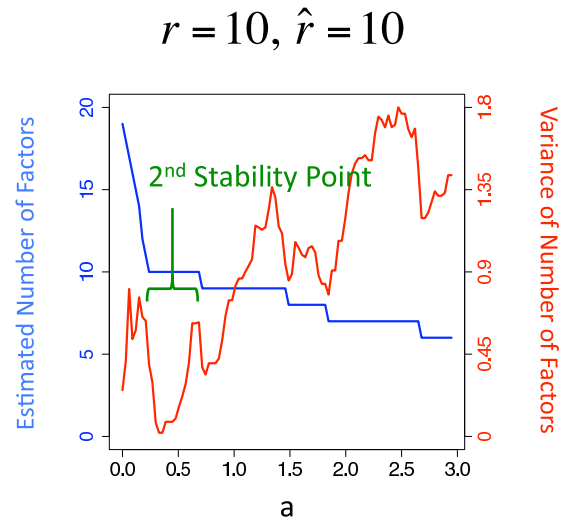

**Figure 5.** A plot of the estimated number of factors (blue and left axis) and the empirical variance of the estimate for varying set sizes (red and right axis) across a range of coefficients  $a$  for a simulated example with  $r = 10$ . The second stability point (green bracket) is the second point, moving from left to right, where the variance finds a trough. Hallin & Liska (2007) suggest using the estimate corresponding to this second stability point as a practical estimator of the number of factors.

$$r = 10, \hat{r} = 10$$

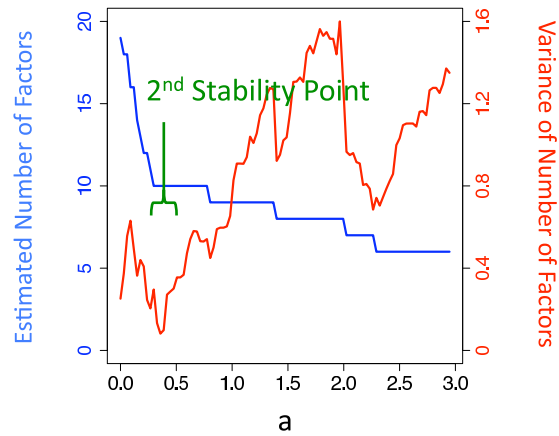

**Figure 6.** A plot of the estimated number of factors (blue and left axis) and the empirical variance of the estimate for varying set sizes (red and right axis) across a range of coefficients  $a$  for a simulated example with  $r = 10$ . The second stability point (green bracket) is the second point, moving from left to right, where the variance finds a trough. Hallin & Liska (2007) suggest using the estimate corresponding to this second stability point as a practical estimator of the number of factors.

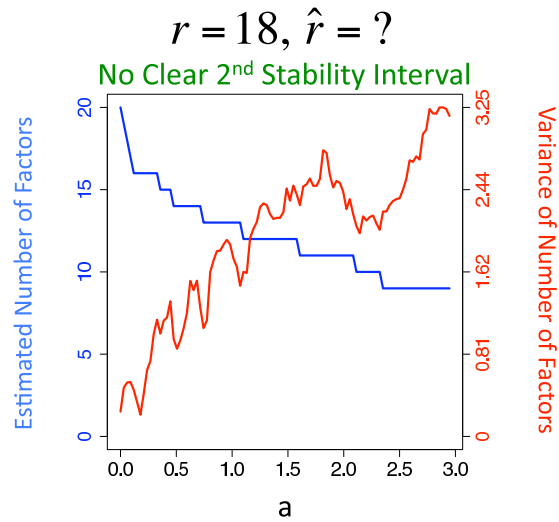

**Figure 7.** A plot of the estimated number of factors (blue and left axis) and the empirical variance of the estimate for varying set sizes (red and right axis) across a range of coefficients  $a$  for a simulated example with  $r = 18$ . The second stability point (green bracket) is the second point, moving from left to right, where the variance finds a trough. Hallin & Liska (2007) suggest using the estimate corresponding to this second stability point as a practical estimator of the number of factors. Since  $r = 18$  is close to the sample size  $n = 20$ , there is no clear second stability point, so the Hallin & Liska approach does not give an estimate.

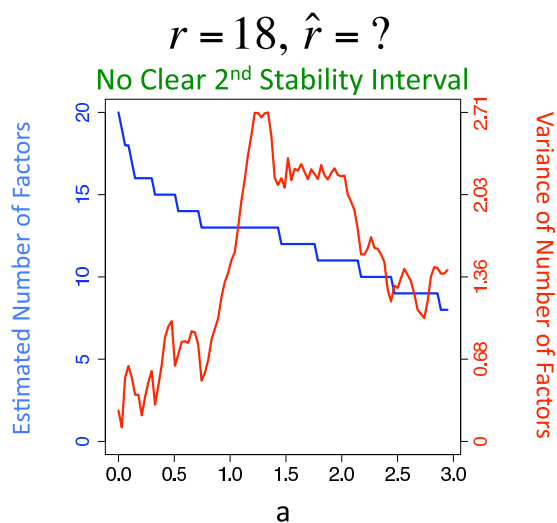

**Figure 8.** A plot of the estimated number of factors (blue and left axis) and the empirical variance of the estimate for varying set sizes (red and right axis) across a range of coefficients  $a$  for a simulated example with  $r = 18$ . The second stability point (green bracket) is the second point, moving from left to right, where the variance finds a trough. Hallin & Liska (2007) suggest using the estimate corresponding to this second stability point as a practical estimator of the number of factors. Since  $r = 18$  is close to the sample size  $n = 20$ , there is no clear second stability point, so the Hallin & Liska approach does not give an estimate.

**Table 1**

Results from a simulation experiment. For each combination of  $m, n$  and  $r$ , 100 independent microarray data sets were simulated. The average (s.d.) RMSFE, a measure of how well the eigenvectors of  $W_m$  span the linear space spanned by  $G$ , is reported for the Lemma 1 estimator of  $r$  and the Bai & Ng (2002) and Buja & Eyuboglu (1992) estimators.

| $(m, n)$    | $r$ | RMSFE( $\hat{r}$ ) $\times 10^5$ | RMSFE( $\hat{r}_{bn}$ ) $\times 10^5$ | RMSFE( $\hat{r}_{be}$ ) $\times 10^5$ |
|-------------|-----|----------------------------------|---------------------------------------|---------------------------------------|
| (1000,10)   | 3   | 403.84 (773.88)                  | 2514.19 (2881.21)                     | 915.18 (1571.98)                      |
| (5000,10)   | 3   | 78.44 (271.25)                   | 3022.17 (2409.22)                     | 785.95 (1446.20)                      |
| (10000,10)  | 3   | 50.18 (215.60)                   | 2881.82 (2585.60)                     | 817.71 (1753.53)                      |
| (1000,20)   | 3   | 109.77 (23.18)                   | 685.79 (1683.42)                      | 133.18 (237.64)                       |
| (5000,20)   | 3   | 22.49 (4.67)                     | 426.71 (1266.14)                      | 22.49 (4.67)                          |
| (10000,20)  | 3   | 10.42 (2.22)                     | 193.79 (972.41)                       | 10.42 (2.22)                          |
| (1000,100)  | 3   | 101.24 (7.29)                    | 101.24 (7.29)                         | 101.24 (7.29)                         |
| (5000,100)  | 3   | 20.26 (1.57)                     | 20.26 (1.57)                          | 20.26 (1.57)                          |
| (10000,100) | 3   | 10.11(0.82)                      | 10.11(0.82)                           | 10.11 (0.82)                          |
| (1000,10)   | 5   | 822.46 (624.17)                  | 2514 .19 (1704.76)                    | 3256.58 (1698.78)                     |
| (5000,10)   | 5   | 224.48(309.48)                   | 3022.17 (1729.20)                     | 2885.43 (1636.53)                     |
| (10000,10)  | 5   | 129.70(245.14)                   | 2606.50 (1371.87)                     | 2655.60 (1474.46)                     |
| (1000,20)   | 5   | 395.34 (591.32)                  | 1378.21 (1101.71)                     | 480.67 (718.98)                       |
| (5000,20)   | 5   | 46.95 (151.17)                   | 1298.78 (1109.70)                     | 230.22 (563.62)                       |
| (10000,20)  | 5   | 18.00 (78.65)                    | 980.16 (991.06)                       | 191.60 (478.68)                       |
| (1000,100)  | 5   | 99.65 (7.22)                     | 99.65 (7.22)                          | 99.65 (7.21)                          |
| (5000,100)  | 5   | 20.11(1.31)                      | 20.11 (1.31)                          | 20.11 (1.31)                          |
| (10000,100) | 5   | 10.10 (0.63)                     | 10.10 (0.63)                          | 10.10 (0.63)                          |
| (1000,20)   | 10  | 1108.28 (435.75)                 | 1732.07 (644.47)                      | 3034.82 (1076.86)                     |
| (5000,20)   | 10  | 297.95 (245.09)                  | 1715.14 (545.61)                      | 2683.19 (717.63)                      |
| (10000,20)  | 10  | 198.12 (164.99)                  | 1592.15 (520.36)                      | 2562.26 (711.42)                      |
| (1000,100)  | 10  | 96.40 (5.31)                     | 96.40 (5.31)                          | 96.40 (5.31)                          |
| (5000,100)  | 10  | 19.30 (1.06)                     | 19.30 (1.06)                          | 19.30 (1.06)                          |
| (10000,100) | 10  | 9.60 (0.44)                      | 9.60(0.44)                            | 9.60 (0.44)                           |
| (1000,20)   | 18  | 1148.48 (273.08)                 | 1562.41(329.37)                       | 5479.46 (1011.77)                     |
| (5000,20)   | 18  | 497.17(144.31)                   | 1484.74 (312.31)                      | 5033.88 (832.27)                      |
| (10000,20)  | 18  | 336.51 (104.66)                  | 1472.69 (350.24)                      | 4876.27 (867.75)                      |
| (1000,100)  | 18  | 314.30 (293.42)                  | 90.25 (3.61)                          | 97.64 (53.06)                         |
| (5000,100)  | 18  | 17.88 (0.74)                     | 17.88 (0.74)                          | 17.88 (0.74)                          |
| (10000,100) | 18  | 8.88 (0.34)                      | 8.88 (0.34)                           | 8.88 (0.34)                           |
